# Supplementary material for: Molecular design, chemical synthesis, and biological evaluation of agents that selectively photo-degrade the transcription factor estrogen receptor-α
Source: Royal Society of Chemistry journal article supplement (doi:10.1039/c1ob05629h), 2011-01-01
Supplement: c1ob05629h.pdf [file c1ob05629h.pdf]

## SUPPLEMENTARY INFORMATION

---

### **Molecular Design, Chemical Synthesis, and Biological Evaluation of Agents that Selectively Photo-degrade the Transcription Factor Estrogen Receptor- $\alpha$**

Kana Tsumura,<sup>1</sup> Akane Suzuki,<sup>1</sup> Takeo Tsuzuki,<sup>1</sup> Shuho Tanimoto,<sup>1</sup> Hajime Kaneko,<sup>1</sup> Shuichi Matsumura,<sup>1</sup> Masaya Imoto,<sup>2</sup> Kazuo Umezawa,<sup>1</sup> Daisuke Takahashi,<sup>1</sup> and Kazunobu Toshima\*<sup>1</sup>

<sup>1</sup>*Department of Applied Chemistry, <sup>2</sup>Department of Bioscience and Informatics, Faculty of Science and Technology, Keio University, 3-14-1 Hiyoshi, Kohoku-ku, Yokohama 223-8522, Japan*

#### **Contents**

**<sup>1</sup>H- and <sup>13</sup>C-NMR spectrum charts**

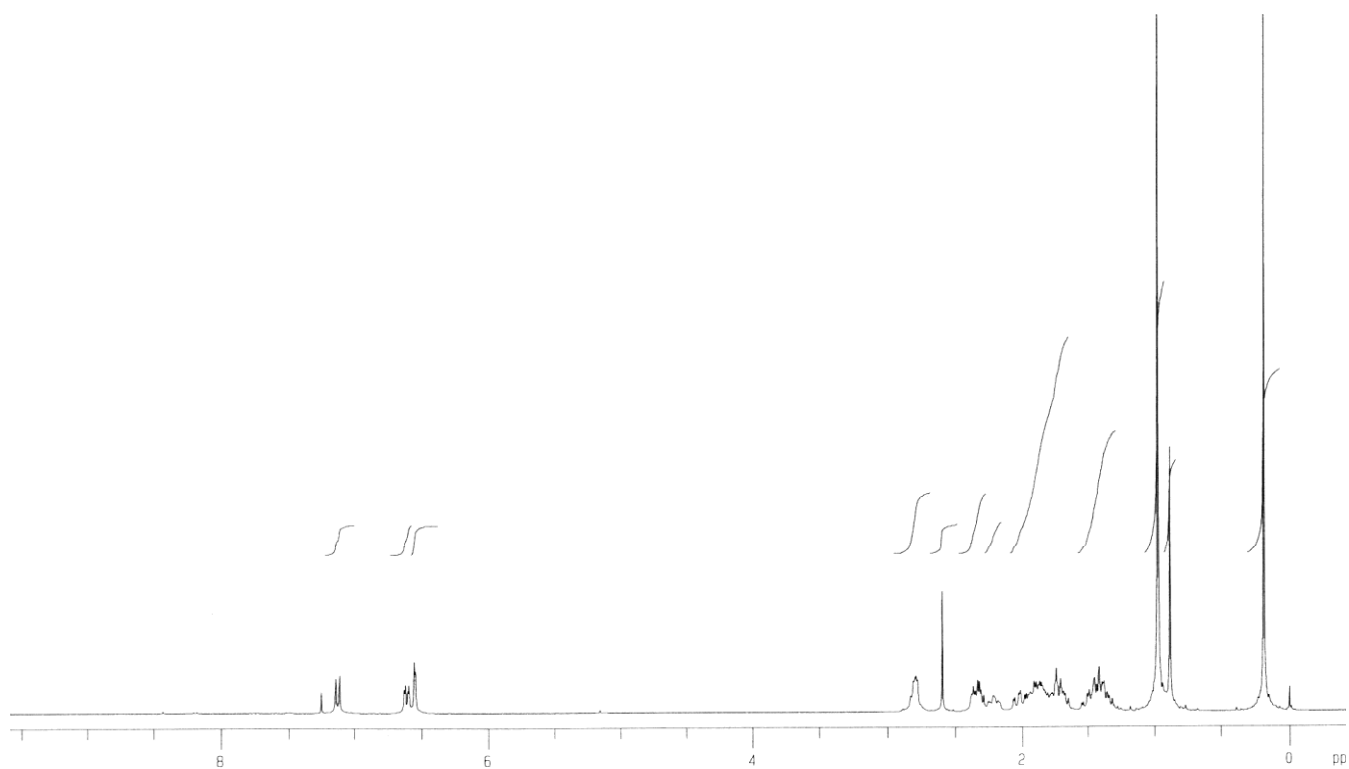

$^1\text{H}$  NMR spectrum of 7

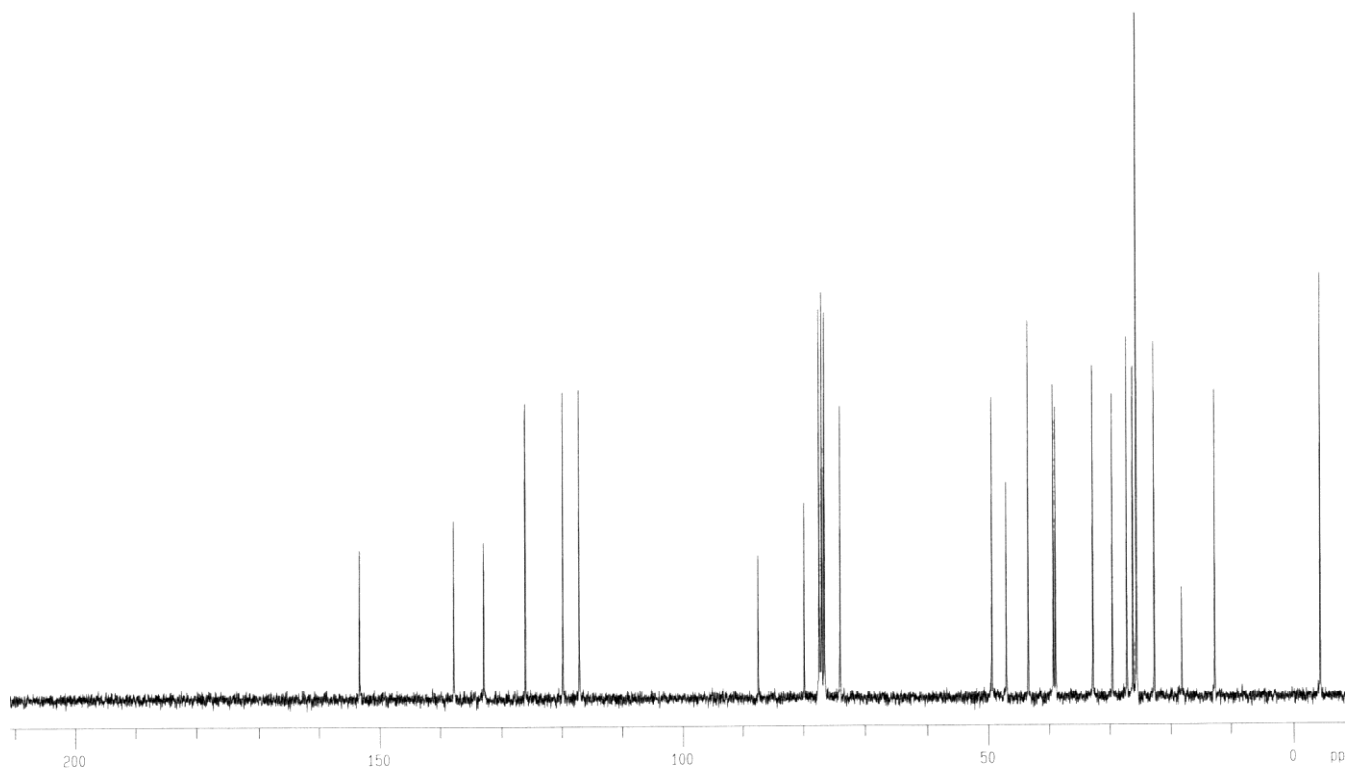

$^{13}\text{C}$  NMR spectrum of 7

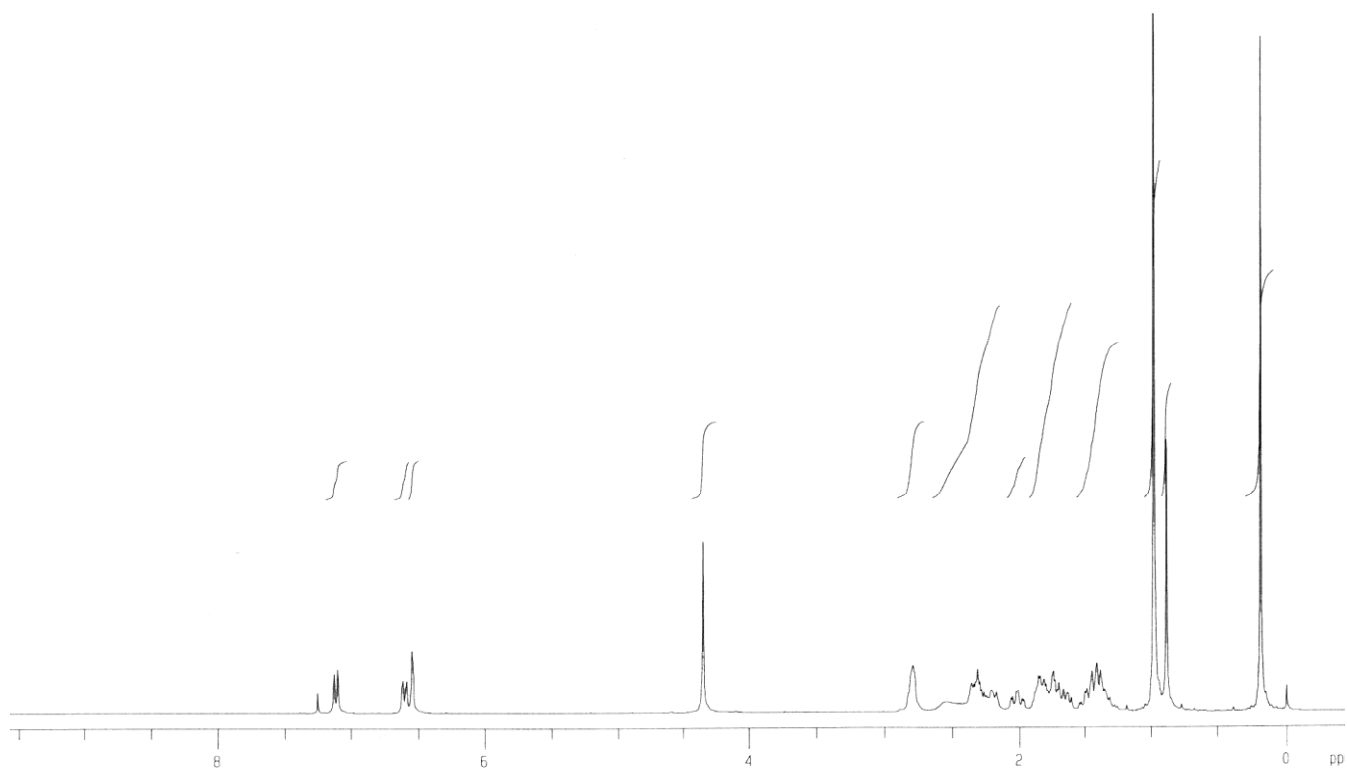

<sup>1</sup>H NMR spectrum of **8**

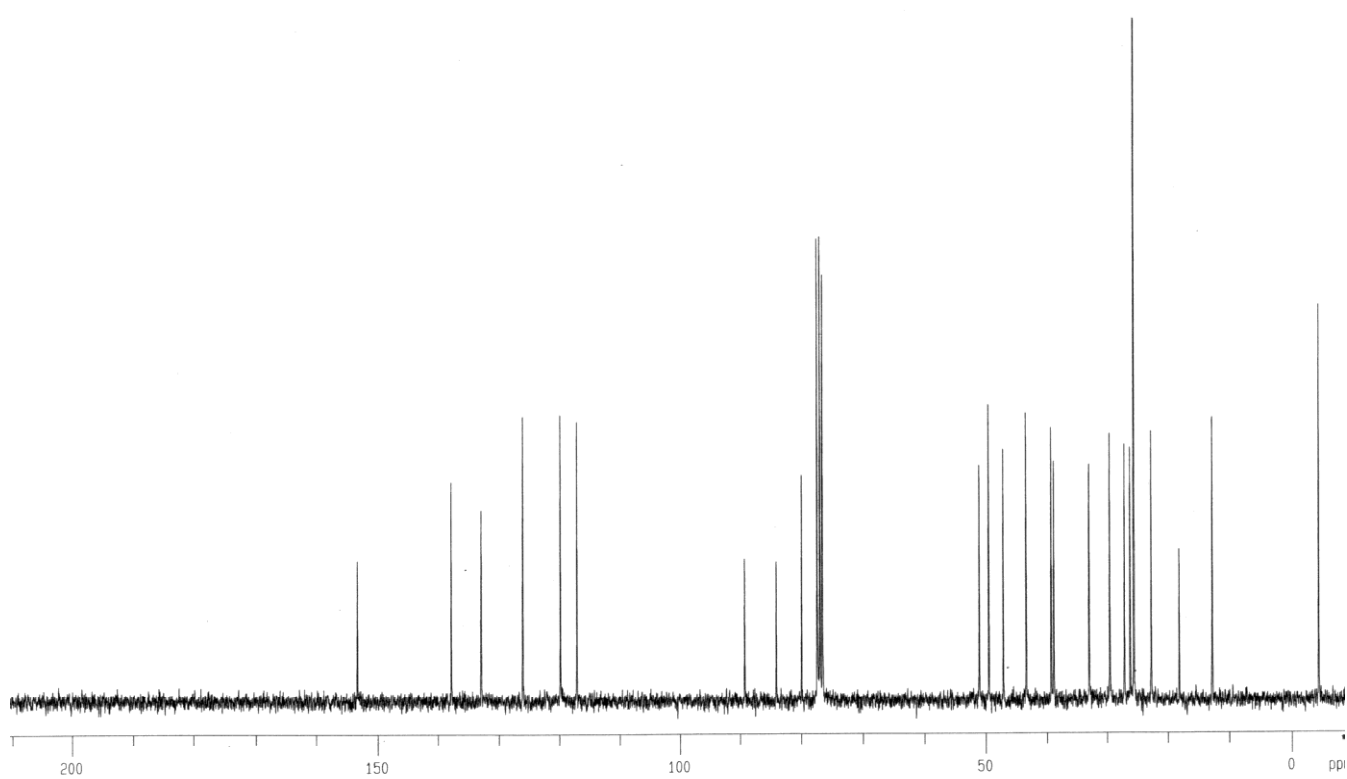

<sup>13</sup>C NMR spectrum of **8**

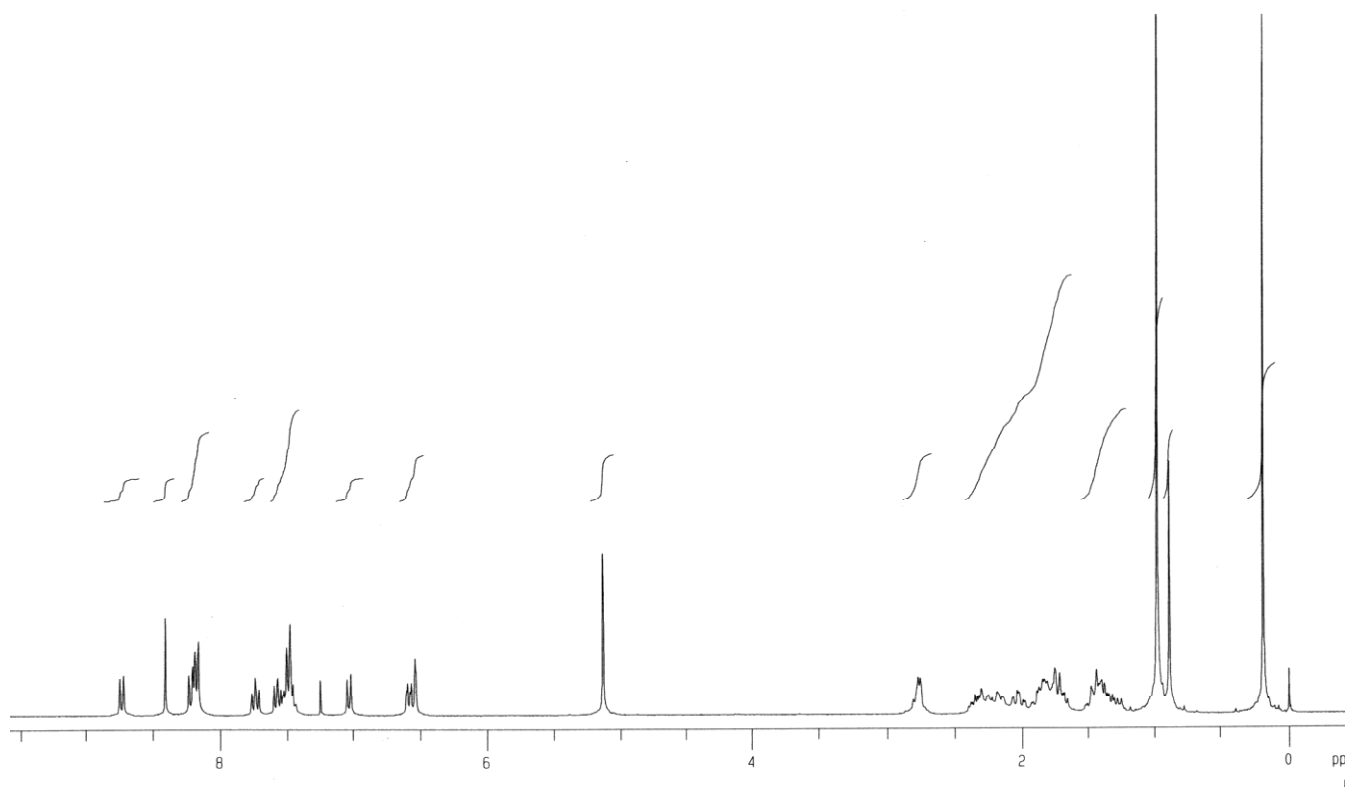

$^1\text{H}$  NMR spectrum of **10**

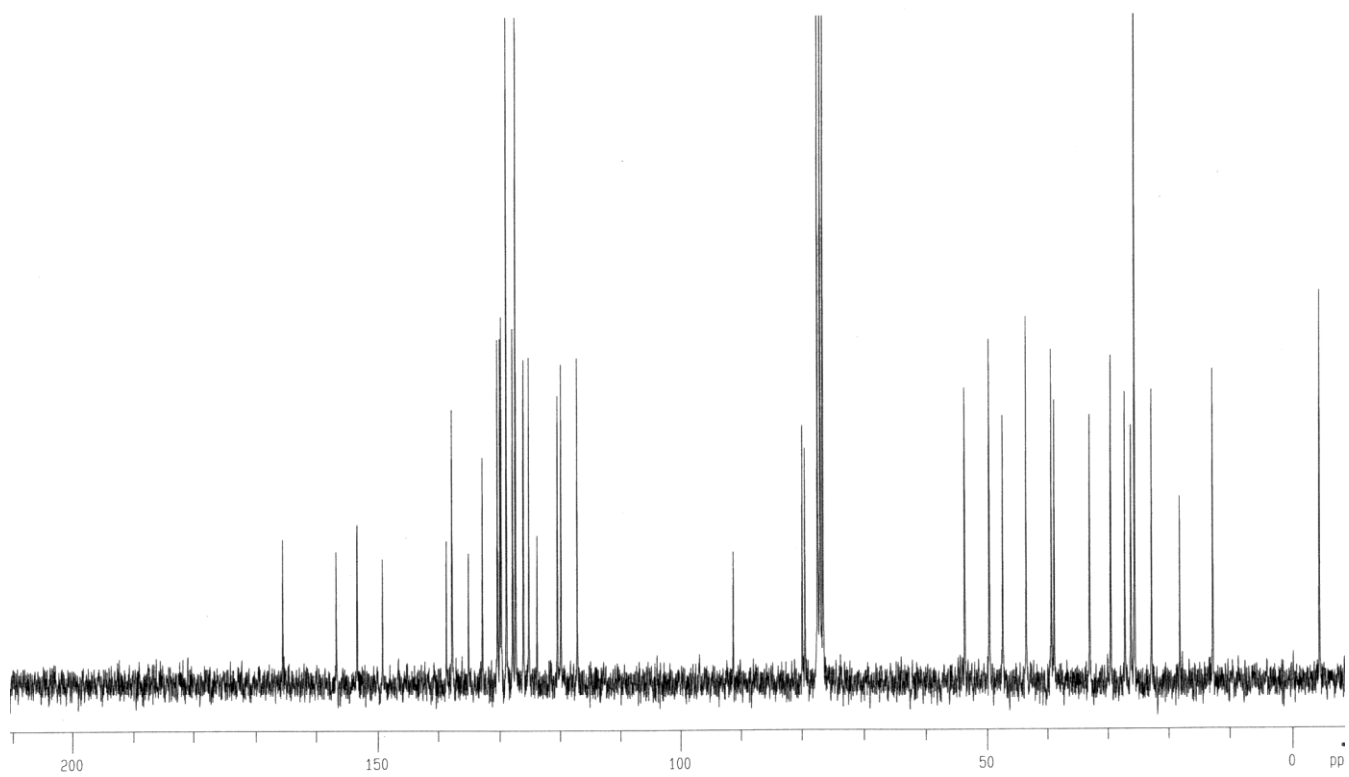

$^{13}\text{C}$  NMR spectrum of **10**

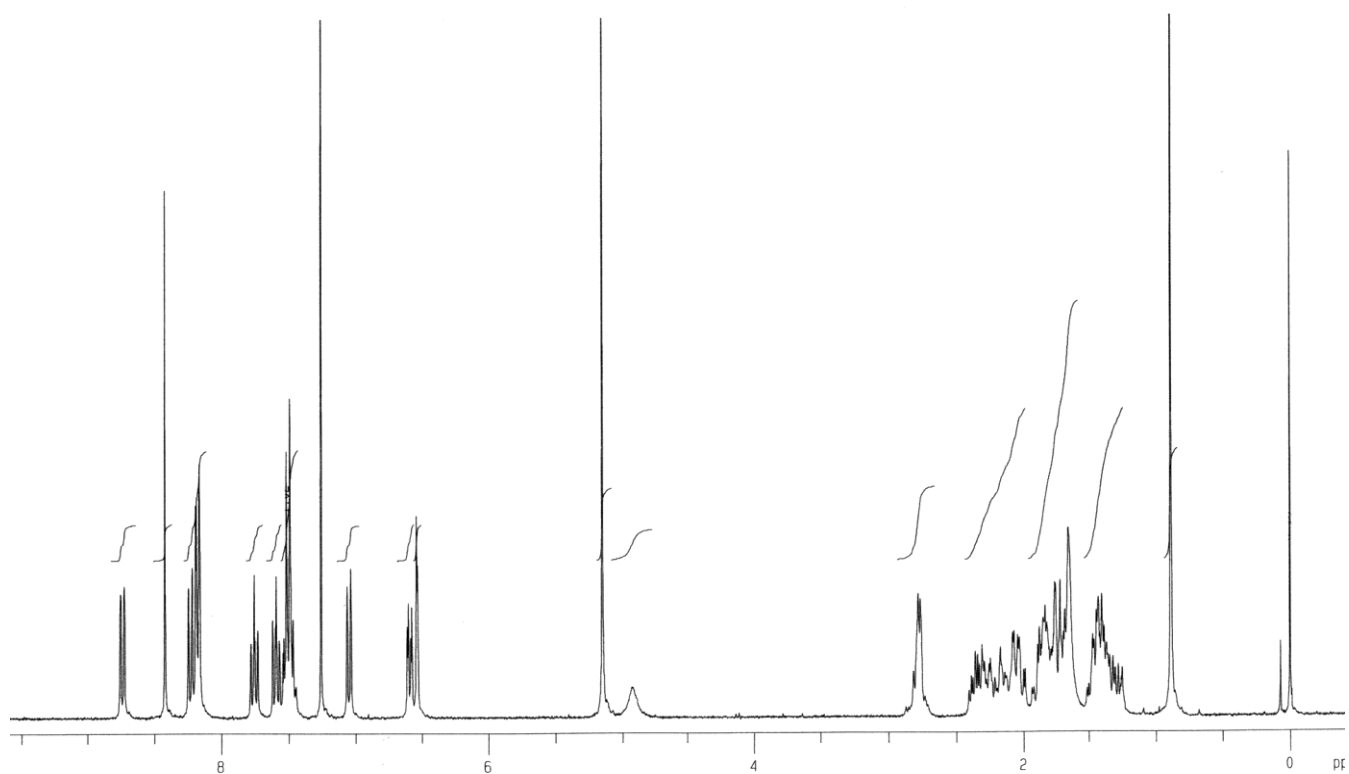

$^1\text{H}$  NMR spectrum of **2**

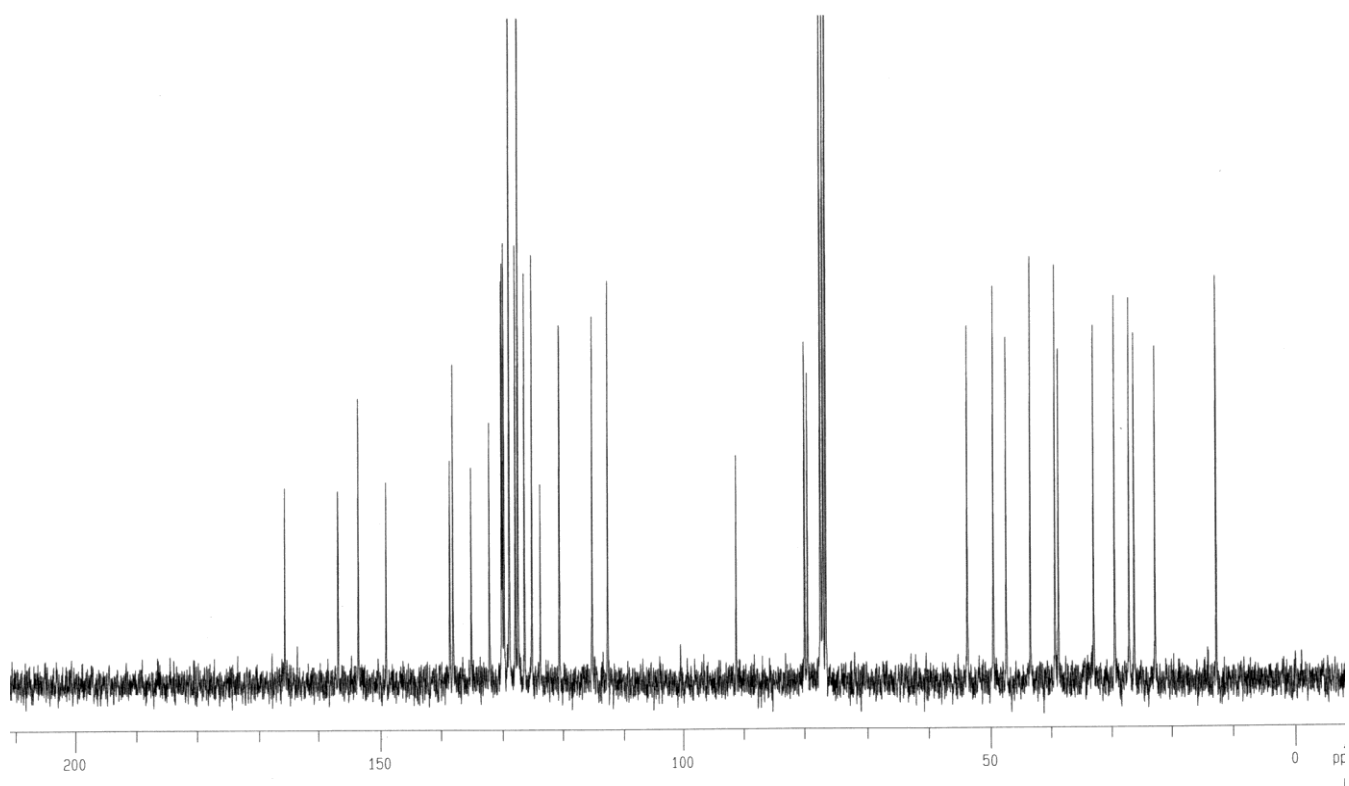

$^{13}\text{C}$  NMR spectrum of **2**

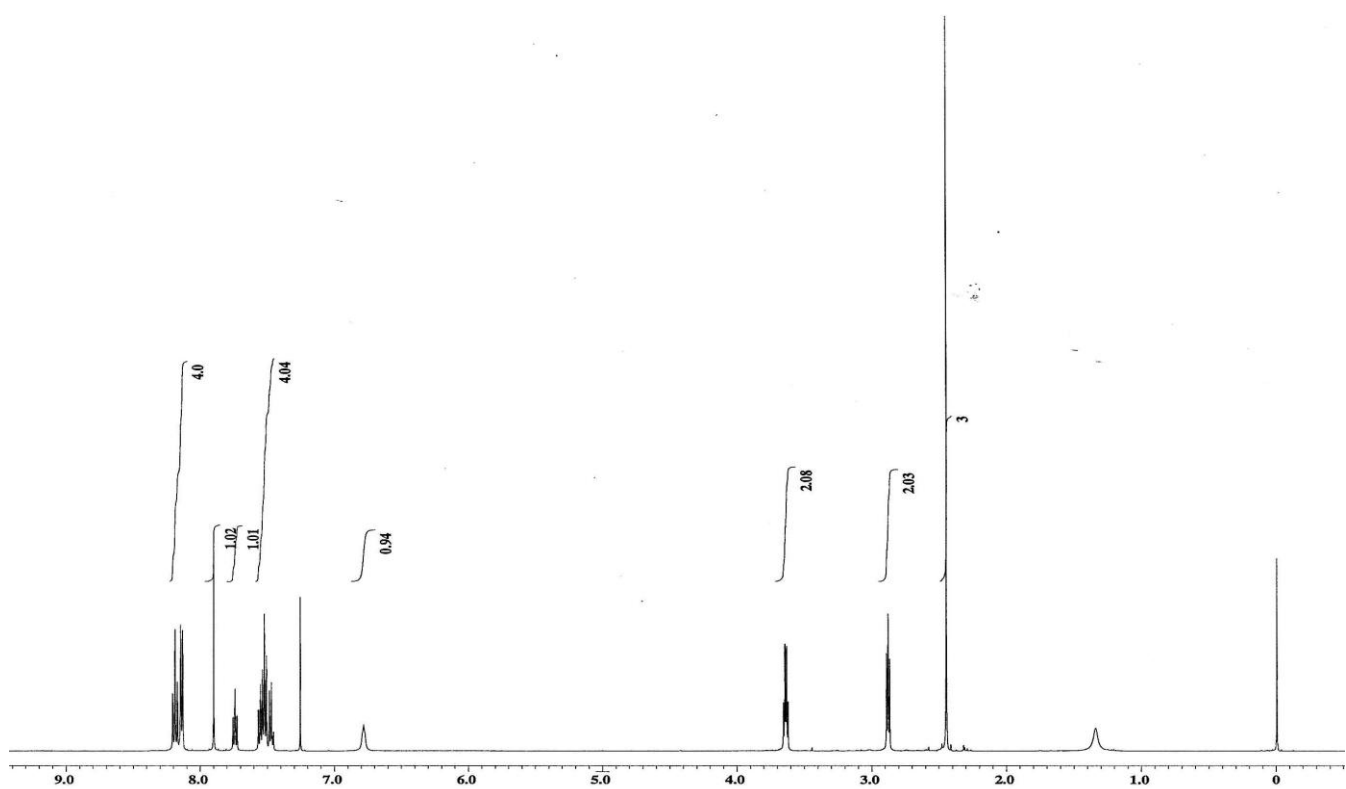

$^1\text{H}$  NMR spectrum of **13**

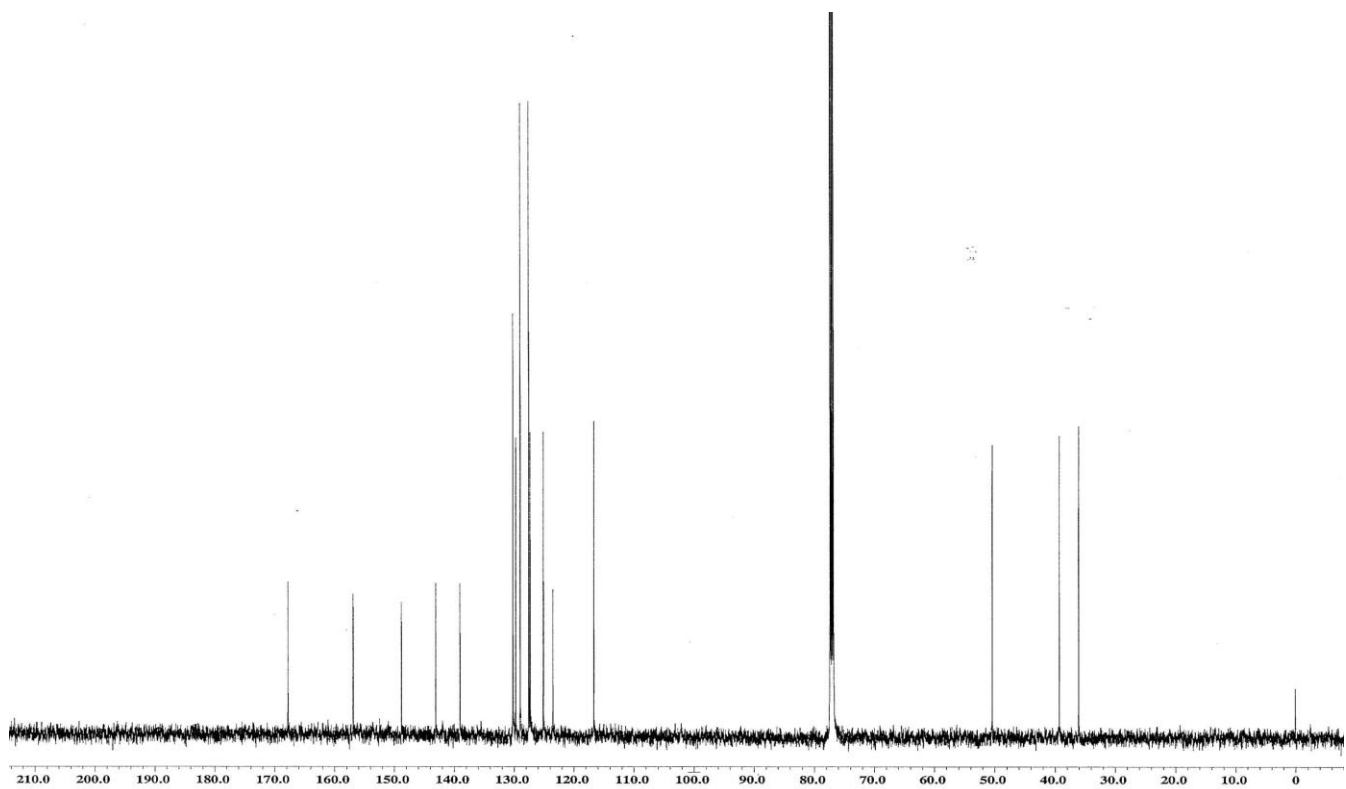

$^{13}\text{C}$  NMR spectrum of **13**

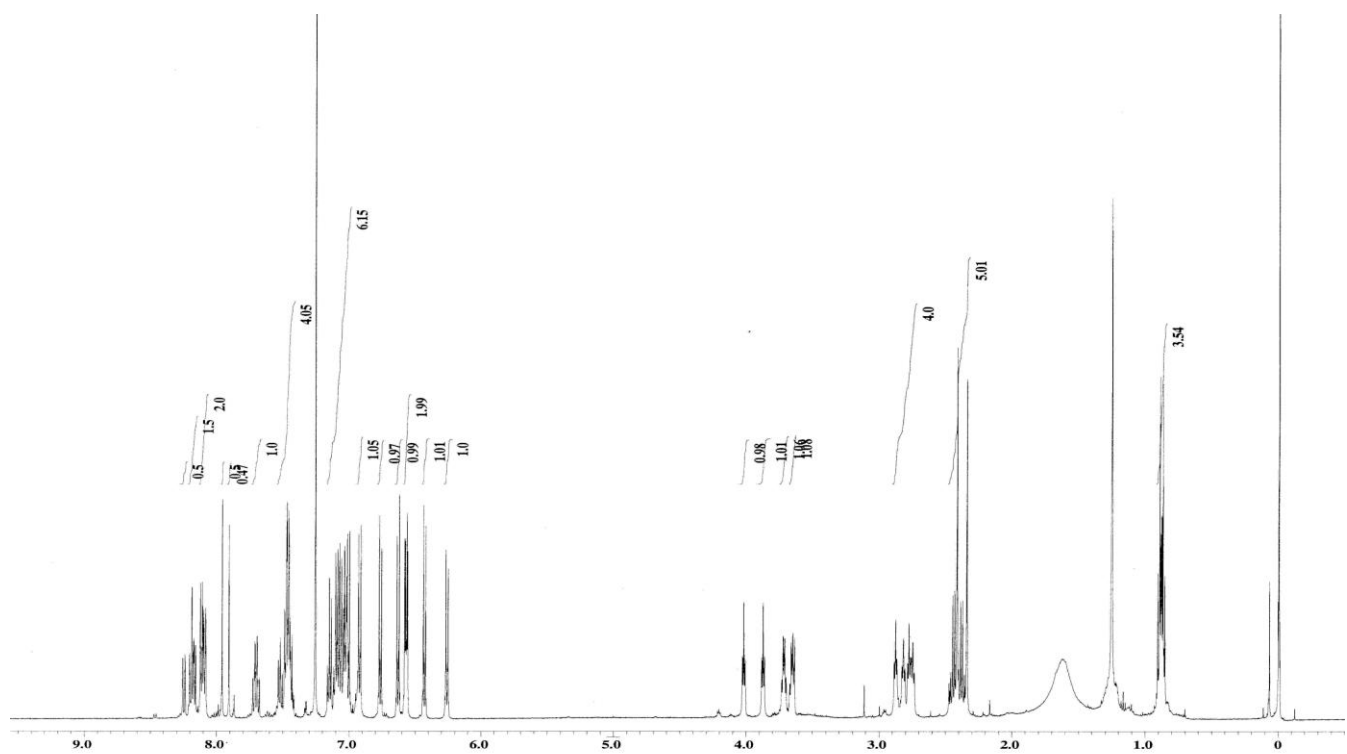

$^1\text{H}$  NMR spectrum of 3
